# Supplementary material for: Dual responsive salen-type Schiff bases for the effective detection of l-arginine via a static quenching mechanism
Source: Royal Society of Chemistry journal article supplement (doi:10.1039/c8nj02657b), 2018-01-01
Supplement: c8nj02657b1.pdf [file c8nj02657b1.pdf]

## Electronic Supplementary Information

### Dual Responsive Salen-type Schiff Bases for the Effective Detection of L-Arginine *via* Static Quenching Mechanism.

Nithya Mohan,<sup>a</sup> S. S. Sreejith,<sup>a</sup> P. M. Sabura Begum<sup>a</sup> and M.R. Prathapachandra Kurup\*<sup>a,b</sup>

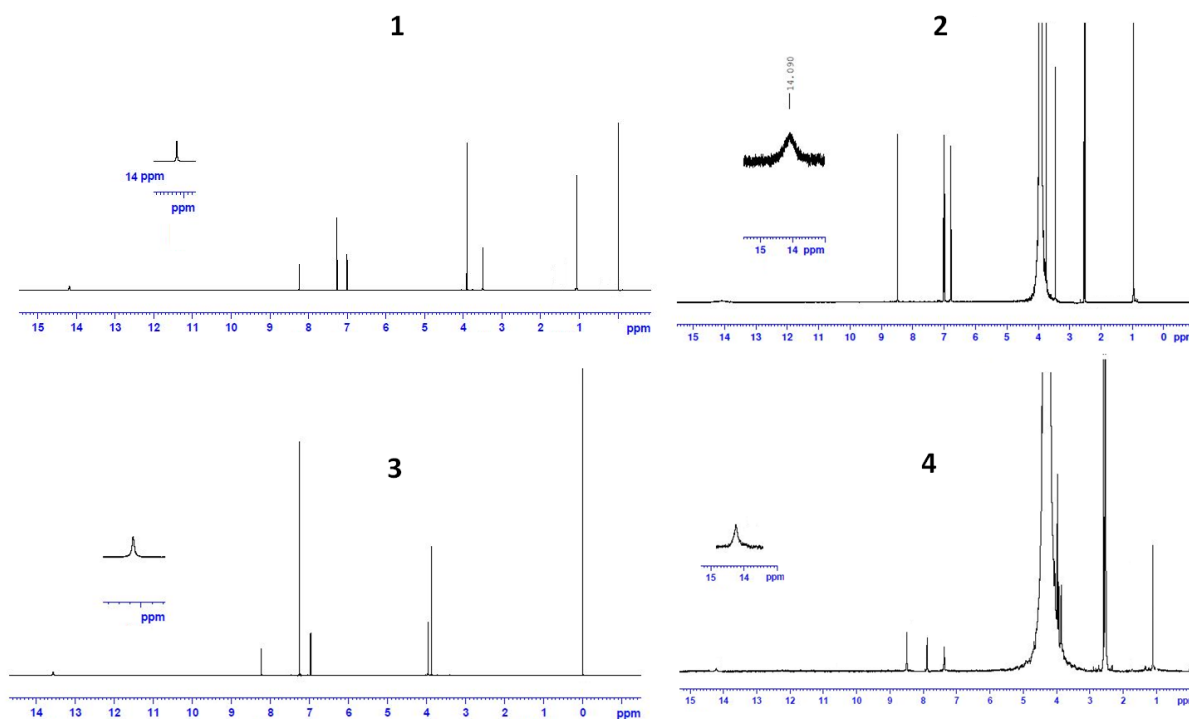

Figure S1. <sup>1</sup>H NMR spectra of sensors 1 to 4.

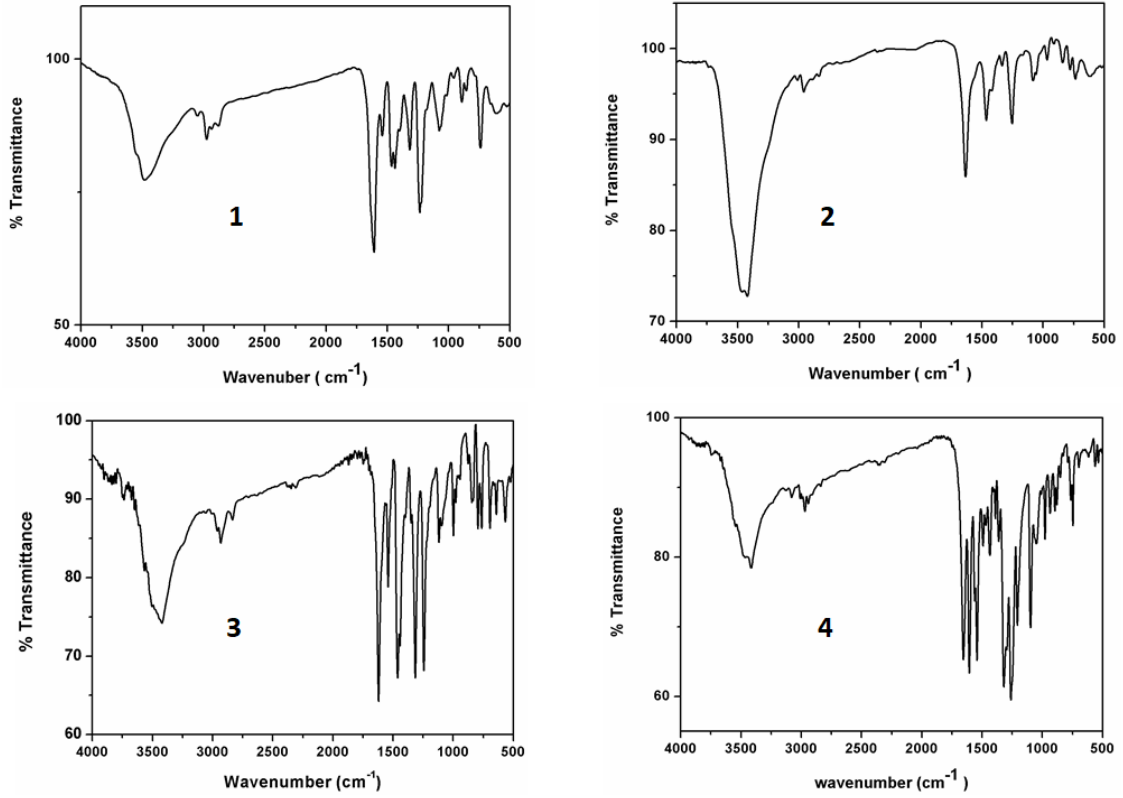

**Figure S2.** FT-IR spectra of sensors **1** to **4**.

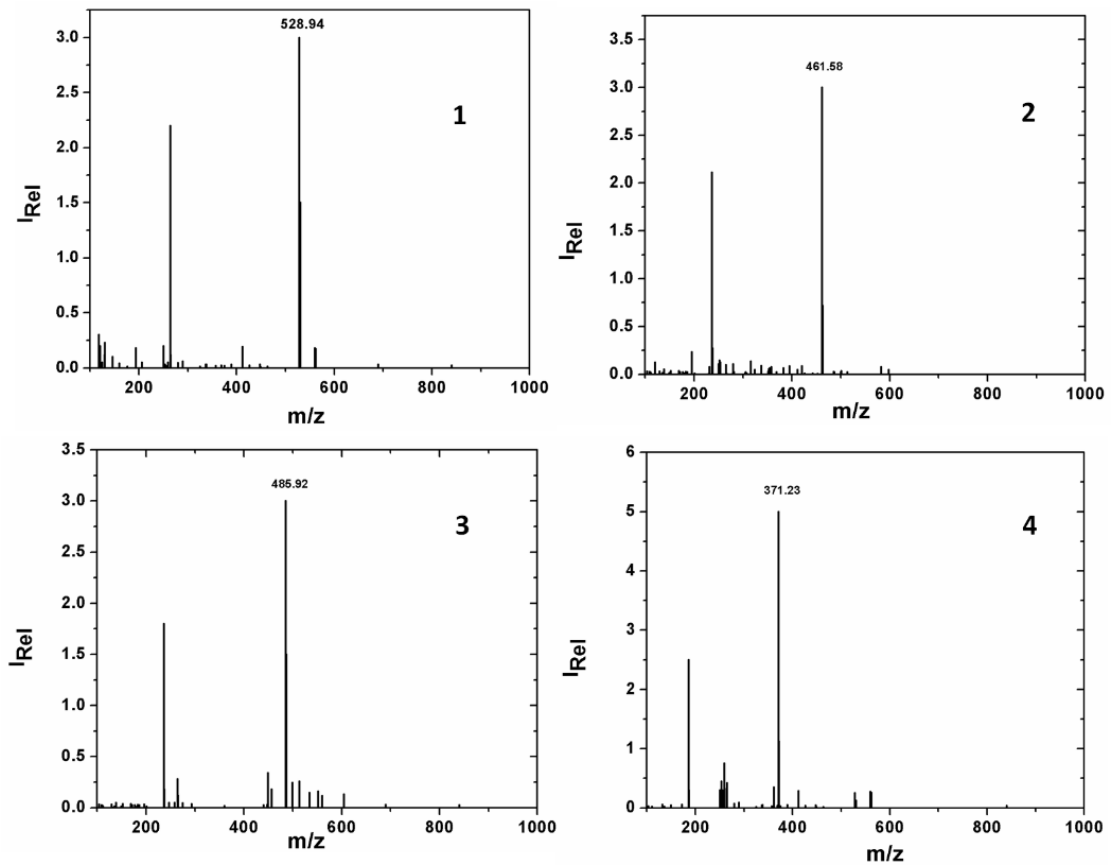

**Figure S3.** GC-MS data of sensors **1** to **4**.

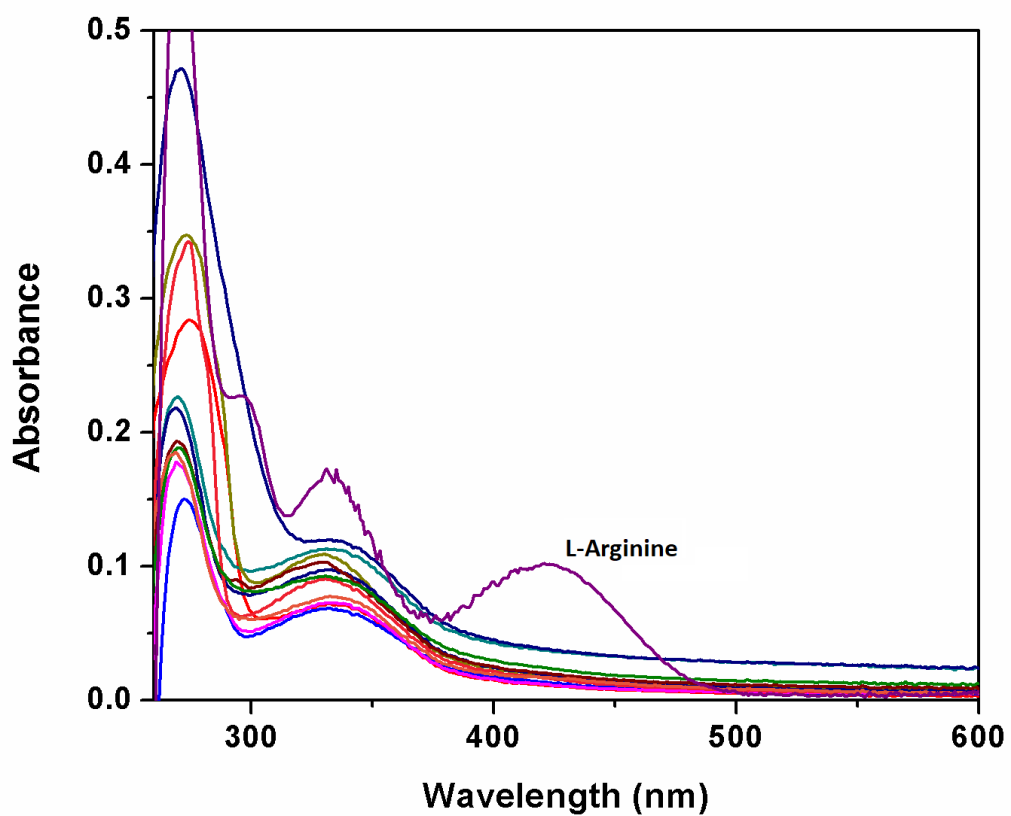

**Figure S4.** Absorption spectra of sensor **1** with five equivalents of various amino acids.

**Table S1**Crystal data and structural refinement parameters of **2**.

| Compound                                                 | <b>2</b>                                                      |
|----------------------------------------------------------|---------------------------------------------------------------|
| Empirical formula                                        | C <sub>21</sub> H <sub>26</sub> N <sub>2</sub> O <sub>4</sub> |
| Formula weight                                           | 370.44                                                        |
| Color                                                    | Yellow                                                        |
| Crystal system                                           | Monoclinic                                                    |
| Space group                                              | <i>P</i> <sub>2</sub> <sub>1</sub> / <i>n</i>                 |
| Cell parameters                                          |                                                               |
| a (Å)                                                    | 15.1698(10)                                                   |
| b (Å)                                                    | 6.9547(4)                                                     |
| c (Å)                                                    | 19.5022(12)                                                   |
| α (°)                                                    | 90                                                            |
| β (°)                                                    | 93.802(3)                                                     |
| γ (°)                                                    | 90                                                            |
| Volume V (Å <sup>3</sup> )                               | 2053.0(2)                                                     |
| Z                                                        | 4                                                             |
| Calculated density (ρ)<br>(Mg m <sup>-3</sup> )          | 1.198                                                         |
| Absorption coefficient, μ<br>(mm <sup>-1</sup> )         | 0.083                                                         |
| F(000)                                                   | 792                                                           |
| Crystal size mm <sup>3</sup>                             | 0.30 x 0.20 x 0.20                                            |
| θ(°) range for data<br>collection                        | 2.69 to 28.35                                                 |
| Limiting indices                                         | -20 ≤ h ≤ 20,<br>-9 ≤ k ≤ 9,<br>-26 ≤ l ≤ 24                  |
| Reflections collected                                    | 24051                                                         |
| Unique Reflections (R <sub>int</sub> )                   | 5084(0.0485)                                                  |
| Absorption correction                                    | Semi-empirical<br>from equivalents                            |
| Maximum and minimum<br>transmission                      | 0.995 and 0.982                                               |
| Refinement method                                        | Full-matrix least-<br>squares on F <sup>2</sup>               |
| Data / restraints /<br>parameters                        | 5084/ 3 / 245                                                 |
| Goodness-of-fit on F <sup>2</sup>                        | 0.879                                                         |
| Final R indices [I > 2σ<br>(I)]                          | R <sub>1</sub> = 0.0604,<br>wR <sub>2</sub> = 0.1659          |
| R indices (all data)                                     | R <sub>1</sub> = 0.1547,<br>wR <sub>2</sub> = 0.2384          |
| Largest difference peak<br>and hole (e Å <sup>-3</sup> ) | 0.264 and -0.206                                              |

$$R_1 = \frac{\sum ||F_o| - |F_c||}{\sum |F_o|} \quad wR_2 = \left[ \frac{\sum w(F_o^2 - F_c^2)^2}{\sum w(F_o^2)^2} \right]^{1/2}$$

**Table S2**Intramolecular hydrogen bonding interactions in **2**.

| <b>Hydrogen bonding interactions</b> |         |           |           |              |
|--------------------------------------|---------|-----------|-----------|--------------|
| D–H···A                              | D–H (Å) | H···A (Å) | D···A (Å) | ∠D–H···A (°) |
| O(2)–H(2)···N(1) <sup>a</sup>        | 0.82    | 1.86      | 2.59      | 147          |
| O(3)–H(3)···N(2) <sup>a</sup>        | 0.82    | 1.87      | 2.59      | 147          |
| C(11)–H(11A)···N(2) <sup>b</sup>     | 0.96    | 2.58      | 2.90      | 115          |

Equivalent position codes : a = 1/2-x, -1/2+y, 1/2-z; b = -1+x, -1+y, z.  
D, Donor; A, acceptor.

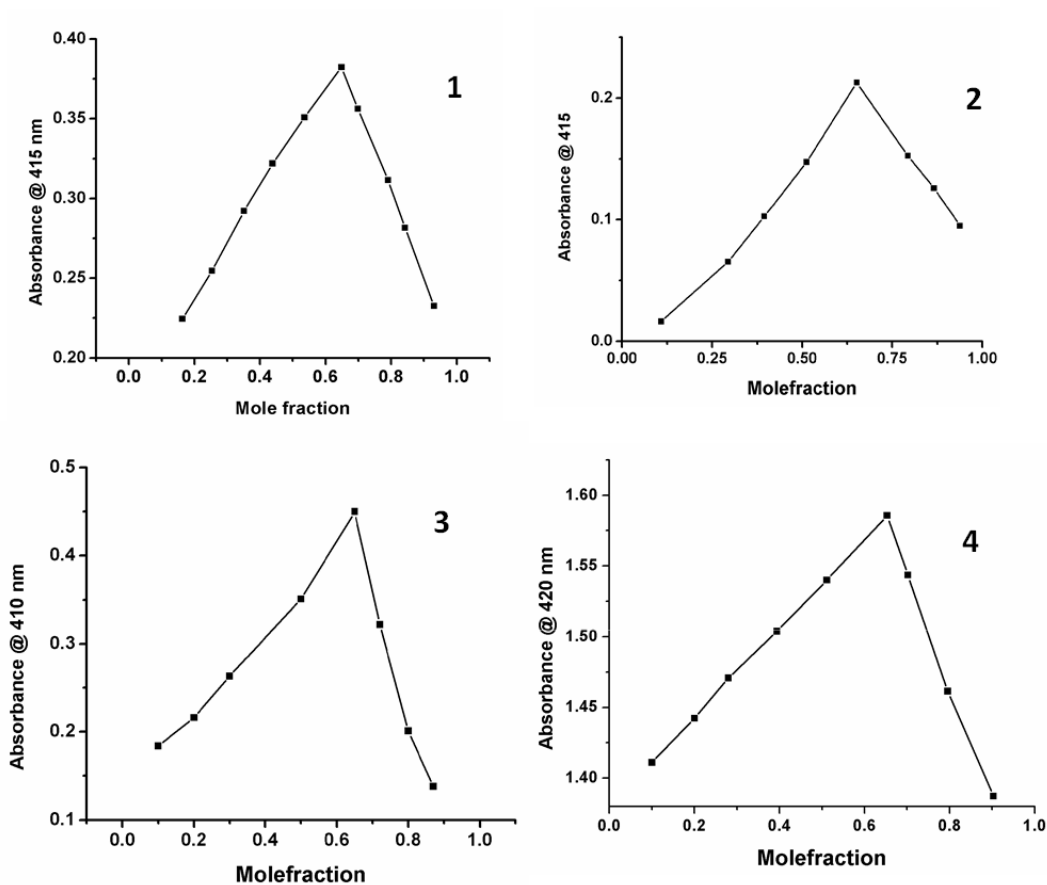**Figure S5.** Jobs plot of sensors **1** to **4** showing 1:2 complex formation between the sensor and the analyte.

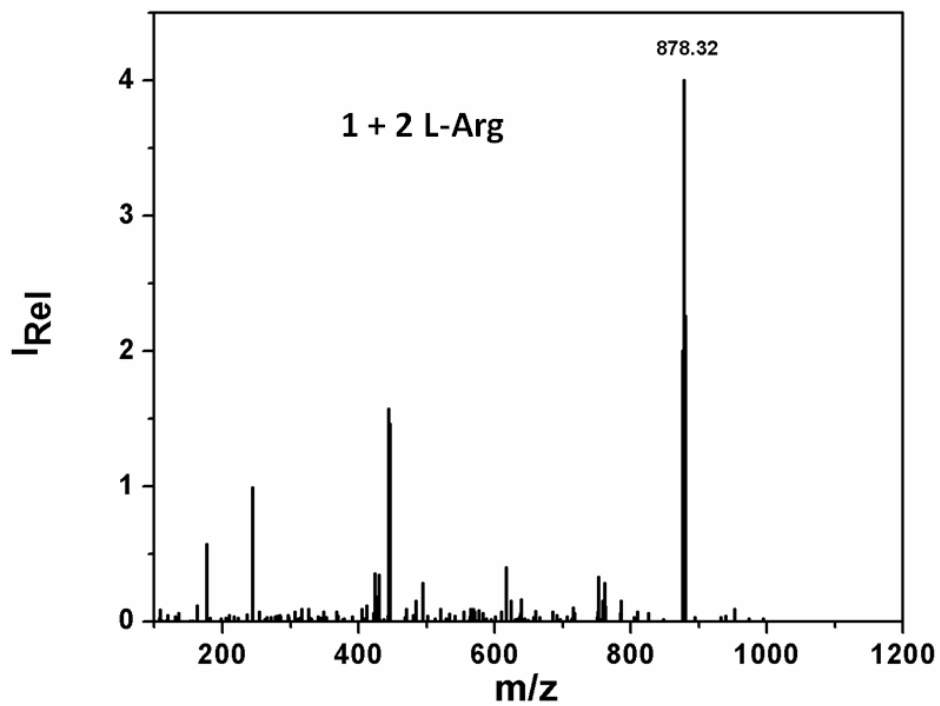

Figure S6. Mass spectrum of 1 + 2 L-Arginine.

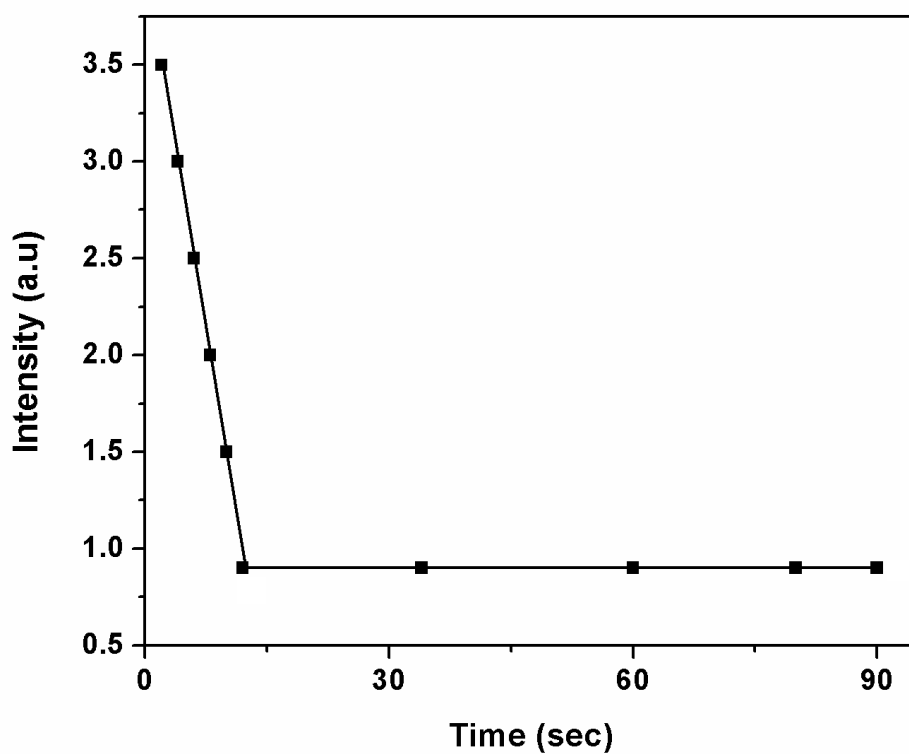

Figure S7. Fluorometric response time of the sensor 4 towards L-Arginine.

**Table S3**

Life time of sensors with and without analyte showing static quenching.

| Compounds       | Average Lifetime (ns) |
|-----------------|-----------------------|
| Sensor 1        | 1.40                  |
| Sensor 1 + L-Ar | 1.52                  |
| Sensor 2        | 0.95                  |
| Sensor 2 + L-Ar | 0.91                  |
| Sensor 3        | 0.62                  |
| Sensor 3 + L-Ar | 0.68                  |
| Sensor 4        | 1.25                  |
| Sensor 4 + L-Ar | 1.49                  |

**Table S3**

$K_{SV}$  values as obtained from Stern-Volmer plots and quantum yield measurements against standard quinine sulphate for 1-4.

| Sensor         | 1     | 2     | 3     | 4     |
|----------------|-------|-------|-------|-------|
| $K_{SV}(10^4)$ | 11.43 | 6.42  | 6.89  | 13.85 |
| $\Phi$         | 0.107 | 0.274 | 0.110 | 0.386 |

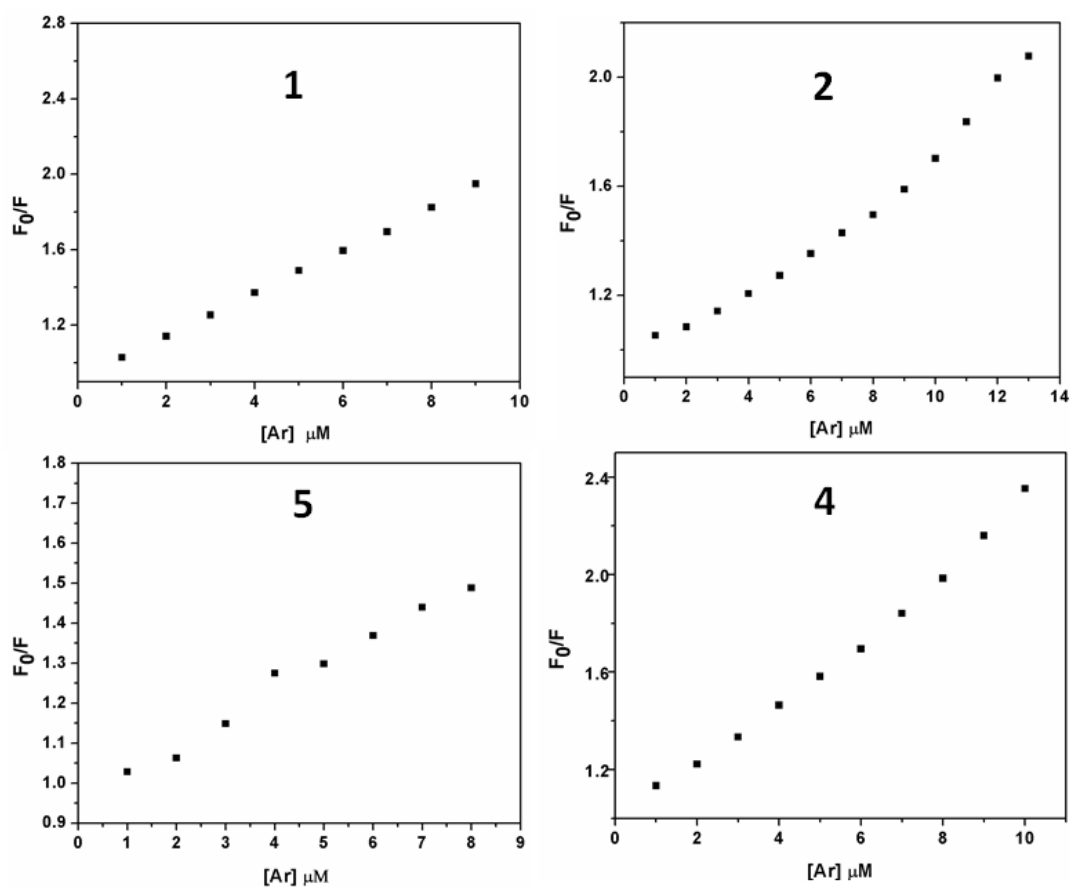**Figure S8.** Stern-Volmer plots for sensors 1 to 4.

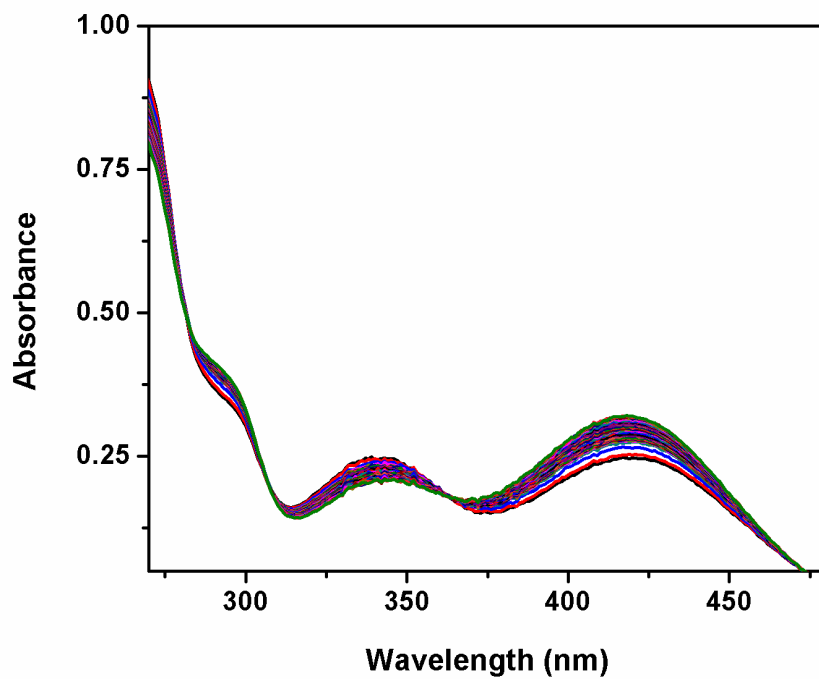

**Figure S9.** Absorption titration of **1** with guanidine.

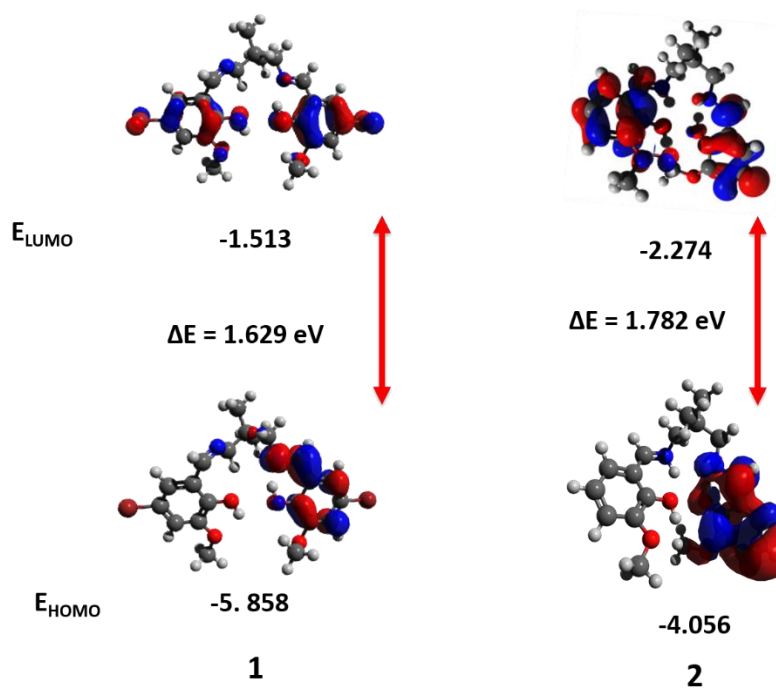

**Figure S10.** HOMO-LUMO plots of DFT optimized structures of **1** and **2** with the associated energy gaps.



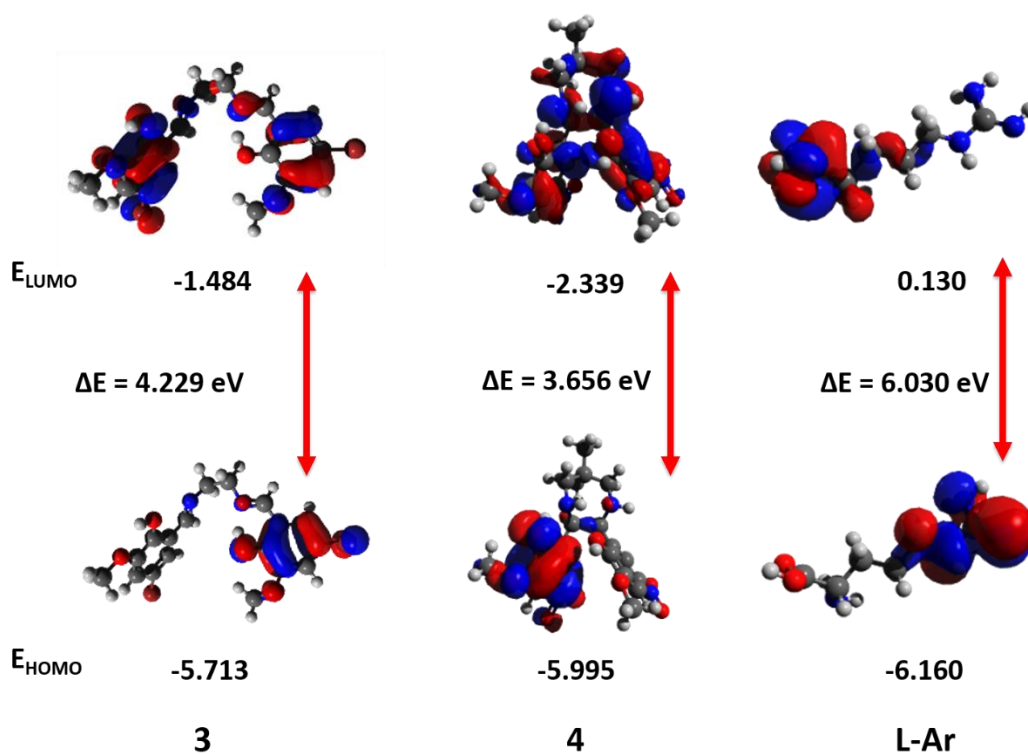

**Figure S11.** HOMO-LUMO plots of DFT optimized structures of **3**, **4** and **L-Ar** with the associated energy gaps.

### Frontier orbital compositional analysis

Frontier orbital calculations were performed using Mulliken method as employed in multiwfn program version 3.3.9.<sup>1</sup> In the case of **1**, HOMO is on one of the benzene rings 73.15% with a little contribution from the azomethine group of the same side (19.13%). But the LUMO is evenly distributed among the two sides with phenolic groups having the highest contribution of about 86.65%. For **2**, HOMO is on the benzene ring of one side with a contribution of about 79.37% and on the methoxy oxygen group (15.44%). In the case of **3**, the trend is similar with the HOMO being concentrated on one of the benzene ring (75.68%) and azomethine nitrogen atom (19.15%) and the LUMO on phenolic moieties (82.27%) on either side with a slight contribution from bromine atoms (9.19%). In **4**, HOMO is mainly concentrated on one of the benzene rings with a cumulative contribution of about 88.96% and there is some share from the oxygen atoms of the nitro group (7.21%) while LUMO is concentrated on phenolic moieties on either side with a total contribution of about 76.58%. In the case of L-Arginine, the HOMO is concentrated on the nitrogen atoms of the amine side with a cumulative contribution of about 85.51% and the LUMO is on the acidic part oxygen atoms with a total of about 79.10%.

### Reference

1. T. Lu and F. Chen, *J. Comput. Chem.*, 2012, **33**, 580-592.
